# Supplementary material
Source: PubMed Central journal article supplement (PMC3912862)
Supplement: NIHMS524449-supplement-01.pdf [file NIHMS524449-supplement-01.pdf]

**Table E1:** Questionnaire items related to atopic symptoms and diseases in the Norwegian Mother and Child Cohort Study

| Questionnaire    | Questionnaire Item                                                                                                                    | Alternatives                                                                                                             | Variable Name                                                                                                                                    |
|------------------|---------------------------------------------------------------------------------------------------------------------------------------|--------------------------------------------------------------------------------------------------------------------------|--------------------------------------------------------------------------------------------------------------------------------------------------|
| <b>6 months</b>  | Does your child have or has he/she had atopic eczema (childhood eczema)?                                                              | 1) No 2) Yes                                                                                                             | <b>Atopic eczema 6 months</b>                                                                                                                    |
| <b>18 months</b> | Does your child have or has he/she had atopic eczema (childhood eczema)?                                                              | 1) No 2) Yes, has now<br>3) Yes, had previously                                                                          | <b>Current atopic eczema 18 months</b> (if “Yes, has now”)                                                                                       |
| <b>36 months</b> | Has your child suffered from allergy affecting eyes or nose, e.g hayfever since the age of 18 months?                                 | 1) No 2) Yes, has now<br>3) Yes, had previously                                                                          | <b>Rhinoconjunctivitis 18-36 months</b><br>If “yes, has now” and/or “yes, had previously”                                                        |
| <b>36 months</b> | Has your child suffered from asthma since the age of 18 months?<br><br>Has your child taken any medication during the last 12 months? | 1) No 2) Yes, has now<br>3) Yes, had previously<br><br>1) No 2) Yes. If yes, give the name of the medication (free text) | <b>Current asthma at 36 months and asthma medication</b><br>If “yes, has now” and reported use of inhaled glucocorticoids and/or beta-2-agonists |

The 6-month postnatal questionnaire is available from: <http://www.fhi.no/dokumenter/9ecca1c459.pdf>, the 18-month postnatal questionnaire from: <http://www.fhi.no/dokumenter/2640dd4bcc.pdf>, and the 36-month postnatal questionnaire from: <http://www.fhi.no/dokumenter/1927d528c2.pdf>

**Table E2:** Demographic and perinatal characteristics with distribution of probiotic milk consumption in pregnancy for study population with information from post-natal questionnaires at 6, 18, and 36 months and total population (including non-responders to the postnatal questionnaires)

|                                                        | Percent with characteristics |                          | % of probiotic consumers by levels of characteristics <sup>a</sup> |                          |
|--------------------------------------------------------|------------------------------|--------------------------|--------------------------------------------------------------------|--------------------------|
|                                                        | Study pop.<br>(n=40,614)     | Total pop.<br>(n=76,226) | Study pop.<br>(n=40,614)                                           | Total pop.<br>(n=76,226) |
| <b>Consumed probiotic milk or yogurt</b>               |                              |                          |                                                                    |                          |
| No                                                     | 63                           | 64                       |                                                                    |                          |
| Yes                                                    | 37                           | 36                       |                                                                    |                          |
| <b>Marital status</b>                                  |                              |                          |                                                                    |                          |
| Married                                                | 50                           | 48                       | 37                                                                 | 37                       |
| Cohabitated                                            | 47                           | 49                       | 37                                                                 | 36                       |
| Single                                                 | 3                            | 3                        | 35                                                                 | 32                       |
| <b>Maternal education</b>                              |                              |                          |                                                                    |                          |
| Less than high school                                  | 6                            | 20                       | 26                                                                 | 26                       |
| High school                                            | 27                           | 12                       | 29                                                                 | 29                       |
| Up to 4 years of college                               | 44                           | 43                       | 38                                                                 | 38                       |
| > 4 years of college                                   | 23                           | 25                       | 46                                                                 | 46                       |
| <b>Pre-pregnancy body mass index, kg/m<sup>2</sup></b> |                              |                          |                                                                    |                          |
| <18.5                                                  | 3                            | 3                        | 35                                                                 | 34                       |
| 18.5-24.9                                              | 66                           | 65                       | 40                                                                 | 39                       |
| 25-29.9                                                | 22                           | 22                       | 34                                                                 | 33                       |
| 30+                                                    | 9                            | 10                       | 26                                                                 | 27                       |
| <b>Daily smoking at least once during pregnancy</b>    |                              |                          |                                                                    |                          |
| No                                                     | 92                           | 90                       | 38                                                                 | 38                       |
| Yes                                                    | 8                            | 10                       | 24                                                                 | 24                       |
| <b>Maternal history of asthma/allergy</b>              |                              |                          |                                                                    |                          |
| No                                                     | 74                           | 75                       | 37                                                                 | 36                       |
| Yes                                                    | 26                           | 25                       | 39                                                                 | 38                       |
| <b>Parity</b>                                          |                              |                          |                                                                    |                          |
| Primiparous                                            | 49                           | 46                       | 40                                                                 | 40                       |
| Multiparous                                            | 51                           | 54                       | 34                                                                 | 33                       |
| <b>Maternal age at delivery, years</b>                 |                              |                          |                                                                    |                          |
| <20-24                                                 | 9                            | 11                       | 30                                                                 | 30                       |
| 25-29                                                  | 33                           | 33                       | 37                                                                 | 36                       |
| 30-34                                                  | 40                           | 39                       | 38                                                                 | 37                       |
| 35+                                                    | 18                           | 17                       | 39                                                                 | 38                       |
| <b>Cesarean-section</b>                                |                              |                          |                                                                    |                          |
| No                                                     | 86                           | 86                       | 37                                                                 | 36                       |
| Yes                                                    | 14                           | 14                       | 36                                                                 | 35                       |
| <b>Birth weight,g</b>                                  |                              |                          |                                                                    |                          |
| <2500                                                  | 3                            | 3                        | 35                                                                 | 34                       |
| 2500-2999                                              | 9                            | 9                        | 37                                                                 | 36                       |
| 3000-3499                                              | 29                           | 28                       | 38                                                                 | 37                       |
| 3500-4000                                              | 38                           | 37                       | 37                                                                 | 37                       |

---

|               |    |    |    |    |
|---------------|----|----|----|----|
| >4000         | 21 | 23 | 36 | 35 |
| <b>Gender</b> |    |    |    |    |
| Boys          | 51 | 51 | 37 | 36 |
| Girls         | 49 | 49 | 37 | 36 |

---

Less than 3% missing for probiotic milk consumption in pregnancy, maternal history of asthma/allergy, parity, maternal age at delivery, cesarean section, birthweight, child's gender. 3-5% missing for marital status, maternal education, pre-pregnancy body mass index, daily smoking at least once during pregnancy



**Table E3:** Association between maternal (pregnancy) intake of probiotic milk and yogurt in mL/day and atopic eczema, rhinitis, and asthma

| Maternal probiotic consumption (mL/day) | N      | Atopic eczema 6 months |                                   | Current atopic eczema 18 months |                                   | Rhinoconjunctivitis 18-36 months |                                   | Current asthma 36 months and asthma medication |                                   |
|-----------------------------------------|--------|------------------------|-----------------------------------|---------------------------------|-----------------------------------|----------------------------------|-----------------------------------|------------------------------------------------|-----------------------------------|
|                                         |        | Cases %                | Adjusted <sup>a</sup> RR (95% CI) | Cases %                         | Adjusted <sup>a</sup> RR (95% CI) | Cases %                          | Adjusted <sup>a</sup> RR (95% CI) | Cases %                                        | Adjusted <sup>a</sup> RR (95% CI) |
| None (ref)                              | 25,239 | 12.5                   | 1                                 | 13.6                            | 1                                 | 3.8                              | 1                                 | 5.8                                            | 1                                 |
| 13-28.3 mL/day                          | 6,596  | 11.6                   | 0.93 (0.86, 1.00)                 | 13.9                            | 1.03 (0.96, 1.10)                 | 3.0                              | 0.81 (0.69, 0.94)                 | 5.4                                            | 0.97 (0.86, 1.09)                 |
| ≥ 28.4 mL/day                           | 8,295  | 11.9                   | 0.95 (0.88, 1.02)                 | 13.2                            | 0.97 (0.91, 1.04)                 | 3.5                              | 0.93 (0.81, 1.07)                 | 5.7                                            | 1.02 (0.92, 1.14)                 |

<sup>a</sup>Adjusted for maternal age, smoking in pregnancy, maternal education, pre-pregnancy BMI, dietary fiber intake (g/10 MJ), total energy intake, breastfeeding, maternal history of allergic disease, parity, and infant's gender.

**Table E4:** Demographic and perinatal characteristics by maternal probiotic intake of 40,614 children enrolled in the Norwegian Mother and Child Cohort Study between March 2002 and November 2008, who had completed all questionnaires up to the 36-months questionnaire

|                                                                                                 | N with characteristic | Percent of total (n=40,614) | % of probiotic consumers by levels of characteristic <sup>a</sup> |
|-------------------------------------------------------------------------------------------------|-----------------------|-----------------------------|-------------------------------------------------------------------|
| <b>Maternal income (in 1,000 NOK)</b>                                                           |                       |                             |                                                                   |
| >200                                                                                            | 10,427                | 26                          | 33                                                                |
| 200-400                                                                                         | 24,677                | 63                          | 38                                                                |
| >400                                                                                            | 4,326                 | 11                          | 45                                                                |
| <b>Medication use due to upper respiratory tract infections (URTI) in pregnancy<sup>b</sup></b> |                       |                             |                                                                   |
| No                                                                                              | 37,624                | 93                          | 37                                                                |
| Yes                                                                                             | 2,990                 | 7                           | 38                                                                |
| <b>Medication use due to lower respiratory tract infections (LRTI) in pregnancy<sup>c</sup></b> |                       |                             |                                                                   |
| No                                                                                              | 39,745                | 98                          | 37                                                                |
| Yes                                                                                             | 869                   | 2                           | 39                                                                |
| <b>Medication use due to urinary tract infections (UTI) in pregnancy</b>                        |                       |                             |                                                                   |
| No                                                                                              | 37,432                | 92                          | 37                                                                |
| Yes                                                                                             | 3,182                 | 8                           | 37                                                                |
| <b>Medication use due to headache/migraine in pregnancy</b>                                     |                       |                             |                                                                   |
| No                                                                                              | 31,986                | 79                          | 37                                                                |
| Yes                                                                                             | 8,628                 | 21                          | 37                                                                |
| <b>Medication use due to common cold/flu in pregnancy</b>                                       |                       |                             |                                                                   |
| No                                                                                              | 38,591                | 95                          | 37                                                                |
| Yes                                                                                             | 2,023                 | 5                           | 39                                                                |
| <b>Medication use due to fever in pregnancy</b>                                                 |                       |                             |                                                                   |
| No                                                                                              | 39,870                | 98                          | 37                                                                |
| Yes                                                                                             | 744                   | 2                           | 43                                                                |
| <b>Gestational age, weeks</b>                                                                   |                       |                             |                                                                   |
| <37                                                                                             | 1,900                 | 5                           | 35                                                                |
| 37-39                                                                                           | 15,561                | 38                          | 36                                                                |
| 40-41                                                                                           | 19,741                | 49                          | 38                                                                |
| >41                                                                                             | 3,412                 | 8                           | 38                                                                |
| <b>Day care</b>                                                                                 |                       |                             |                                                                   |
| No day care by 18 months                                                                        | 11,086                | 28                          | 33                                                                |
| Day care at 6 months                                                                            | 596                   | 1                           | 34                                                                |
| Started day care by 12 months                                                                   | 5,271                 | 13                          | 38                                                                |
| Started day care by 15 months                                                                   | 17,144                | 43                          | 39                                                                |
| Started day care by 18 months                                                                   | 5,922                 | 15                          | 38                                                                |

<sup>a</sup>P-values <.05 for maternal income, medication use due to common cold/flu and fever in pregnancy, gestational age, and day care. <sup>b</sup>URTI includes tonsillitis, sinusitis, and/or otitis. <sup>c</sup>LRTI includes pneumonia and/or bronchiolitis. Information missing for day care (n=595), maternal income (n=1,184). Medication use due to the various conditions was derived from prenatal questionnaires at gestational weeks 18 and

30 and from the 6-month postnatal questionnaire which queried about the women's medical conditions during the last part of pregnancy. The women were asked: "Have you experienced any of the following illnesses or problems during this pregnancy?" : "Throat infection", Sinusitis/ear infection, "Influenza/common cold", "Pneumonia/bronchitis" "Urinary tract infections", "Fever", "Migraine/other headache". For each of the conditions, the women were asked whether she had taken any medication. We defined medication use due to the various conditions if the women had reported use of medication in the prenatal questionnaires and/or in the 6-month postnatal questionnaire.

**Table E5:** Association between maternal probiotic milk and yogurt consumption in pregnancy and atopic eczema, rhinoconjunctivitis, and asthma among 40,614 children in MoBa whose mothers' had completed the 6, 18, and 36 months postnatal questionnaires

|                                                   | <b>Cases<br/>n</b> | <b>Cases<br/>%*</b> | <b>Unadjusted<br/>RR (95% CI)</b> | <b>Adjusted<sup>a</sup><br/>RR (95% CI)</b> |
|---------------------------------------------------|--------------------|---------------------|-----------------------------------|---------------------------------------------|
| Atopic eczema 6 months                            | 4,849              | 12.2                | 0.94 (0.89, 1.00)                 | 0.93 (0.88, 0.99)                           |
| Current atopic eczema 18 months                   | 5,440              | 13.6                | 0.99 (0.94, 1.04)                 | 1.00 (0.95, 1.06)                           |
| Rhinoconjunctivitis 18-36 months                  | 1,425              | 3.6                 | 0.85 (0.76, 0.95)                 | 0.87 (0.78, 0.98)                           |
| Current asthma 36 months and<br>asthma medication | 2,260              | 5.7                 | 0.96 (0.88, 1.04)                 | 1.00 (0.92, 1.10)                           |

<sup>a</sup>Adjusted for maternal age, smoking in pregnancy, maternal education, pre-pregnancy BMI, dietary fiber intake (g/10 MJ), breastfeeding, maternal history of allergic disease, parity, infant's gender, mode of delivery (Cesarean section versus vaginal), total energy intake (MJ/day), gestational age, maternal income, use of medication in pregnancy due to fever, headache/migraine, URTI, LRTI, UTI, and common cold/flu, and day care (for outcomes reported at 18 months or later). \*Missing outcome data for: atopic eczema 6 months (2.1%), current atopic eczema 18 months (1.3%), rhinoconjunctivitis 18-36 months (2.9%), current asthma 36 months and asthma medication (2.6%). The case percent is calculated with the total N in the denominator with no missing information



**Table E6:** Association between consumption of probiotic milk products by child only, mother only (in pregnancy) and by both the mother and the child and atopic eczema, rhinoconjunctivitis, and asthma among 40,614 children in the MoBa study who had completed all of the follow-up questionnaires

| Probiotic milk products | N      | Current atopic eczema 18 months |                                   | Rhinoconjunctivitis 18-36 months |                                   | Current asthma 36 months and asthma medication |                      |
|-------------------------|--------|---------------------------------|-----------------------------------|----------------------------------|-----------------------------------|------------------------------------------------|----------------------|
|                         |        | Cases %                         | Adjusted <sup>a</sup> RR (95% CI) | Cases %                          | Adjusted <sup>a</sup> RR (95% CI) | Cases %                                        | Adjusted RR (95% CI) |
| No intake (ref)         | 18,572 | 13.6                            | 1                                 | 3.9                              | 1                                 | 5.8                                            | 1                    |
| Child intake only       | 7,000  | 13.6                            | 1.02 (0.94, 1.09)                 | 3.7                              | 0.96 (0.82, 1.11)                 | 5.9                                            | 1.10 (0.98, 1.24)    |
| Mother intake only      | 7,437  | 14.6                            | 1.07 (1.00, 1.15)                 | 3.6                              | 0.92 (0.79, 1.07)                 | 5.3                                            | 0.98 (0.87, 1.10)    |
| Mother and child        | 7,605  | 12.5                            | 0.93 (0.86, 1.00)                 | 3.0                              | 0.80 (0.68, 0.94)                 | 5.8                                            | 1.09 (0.97, 1.22)    |

<sup>a</sup>Adjusted for maternal age, smoking in pregnancy, maternal education, pre-pregnancy BMI, dietary fiber intake (g/10 MJ), breastfeeding, maternal history of allergic disease, parity, infant's gender, mode of delivery, total energy intake (MJ/day), gestational age, maternal income, use of medication in pregnancy due to fever, headache/migraine, URTI, LRTI, UTI, and common cold/flu, and day care

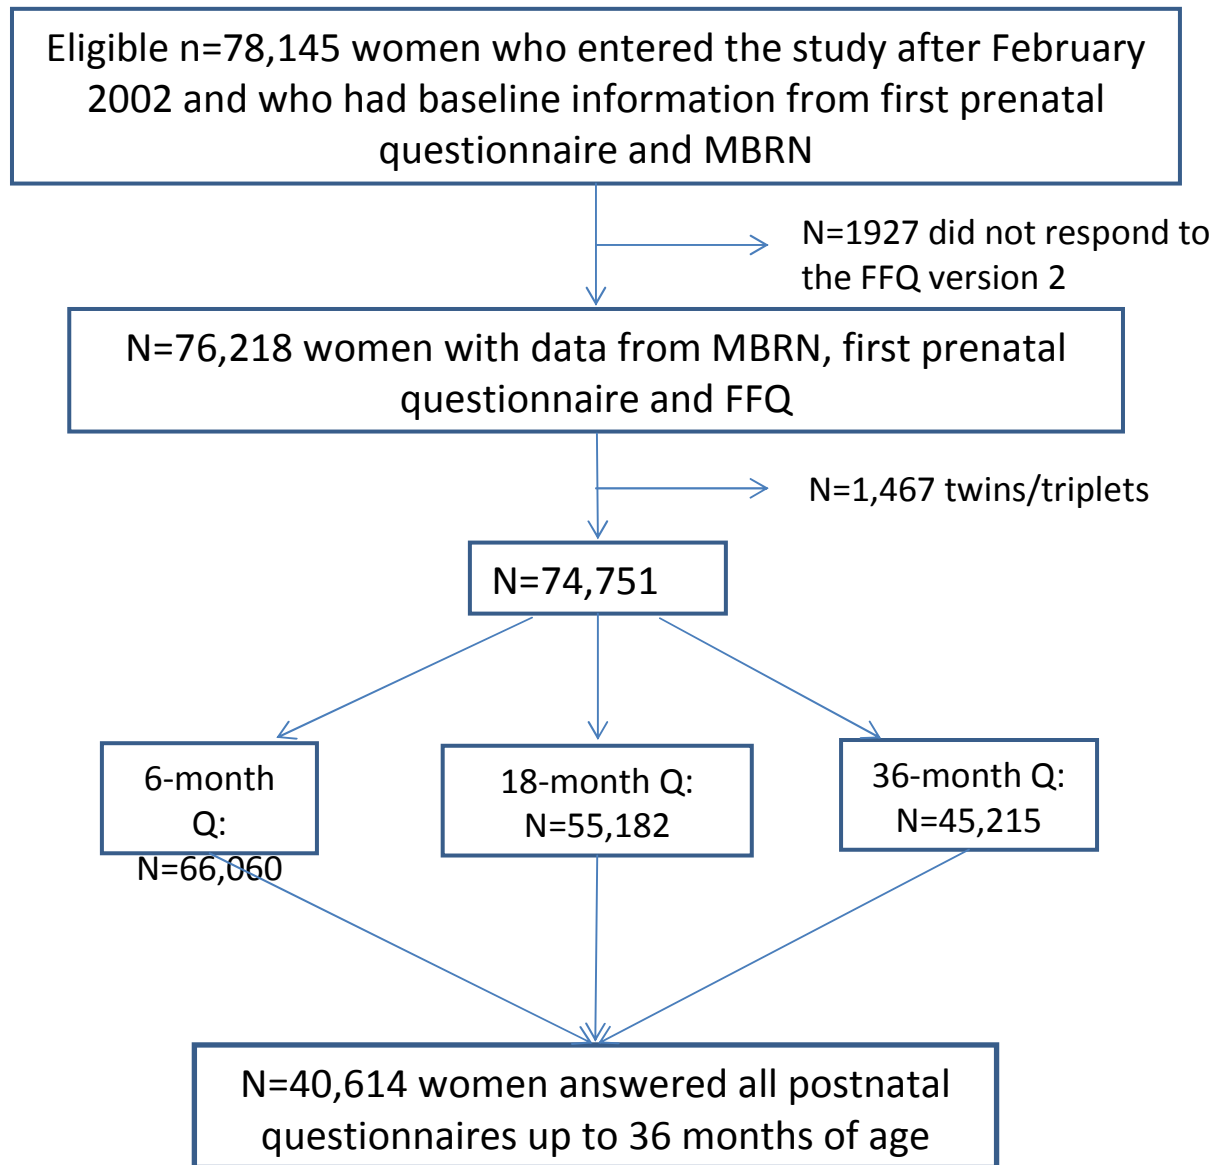

**Figure E1:** Flow-chart of inclusion of study participants from all eligible participants in the Norwegian Mother and Child Cohort Study who entered the study after February 2002
